# Supplementary material for: Associations between Long-Term Air Pollution Exposure and Risk of Osteoporosis-Related Fracture in a Nationwide Cohort Study in South Korea
Source: Int J Environ Res Public Health. 2022 Feb 19;19(4):2404. doi: 10.3390/ijerph19042404 (PMC8872590; doi:10.3390/ijerph19042404)
Supplement: Supplementary file 1 [file ijerph-19-02404-s001.zip › ijerph-1547173-supplementary.pdf]

**Table S1.** Descriptive statistics of included and excluded participants of the NHIS-NCS data (2002-2015).

|                                       | Excluded participants<br>( <i>n</i> = 28,046) | Included participants<br>( <i>n</i> = 56,498) | <i>p</i> -value |
|---------------------------------------|-----------------------------------------------|-----------------------------------------------|-----------------|
| Sex ( <i>n</i> , %)                   |                                               |                                               |                 |
| Men                                   | 12,856 (45.8)                                 | 26,258 (46.5)                                 | 0.080           |
| Women                                 | 15,190 (54.2)                                 | 30,240 (53.5)                                 |                 |
| Age at the entry year ( <i>n</i> , %) |                                               |                                               |                 |
| 50-59y                                | 5,001 (17.8)                                  | 20,683 (36.6)                                 | <0.001          |
| 60-64y                                | 4,526 (16.1)                                  | 15,191 (26.9)                                 |                 |
| 65-69y                                | 5,558 (19.8)                                  | 11,517 (20.4)                                 |                 |
| 70-74y                                | 5,126 (18.3)                                  | 5,854 (10.4)                                  |                 |
| 75-79y                                | 4,319 (15.4)                                  | 2,451 (4.3)                                   |                 |
| 80-84y                                | 3,033 (10.8)                                  | 721 (1.3)                                     |                 |
| 85-89y                                | 483 (1.7)                                     | 81 (0.1)                                      |                 |
| Insurance fee ( <i>n</i> , %)         |                                               |                                               |                 |
| 0-19 <sup>th</sup> percentiles        | 2,224 (8.7)                                   | 4,653 (8.4)                                   | 0.160           |
| 20-39 <sup>th</sup> percentiles       | 3,556 (14.0)                                  | 7,463 (13.5)                                  |                 |
| 40-59 <sup>th</sup> percentiles       | 4,134 (16.2)                                  | 9,180 (16.6)                                  |                 |
| 60-79 <sup>th</sup> percentiles       | 4,582 (18.0)                                  | 9,924 (18.0)                                  |                 |
| 80-100 <sup>th</sup> percentiles      | 10,978 (43.1)                                 | 24,007 (43.5)                                 |                 |

**Table S2.** Pearson correlation coefficients of annual mean concentration (2002-2013) among air pollutants.

|                                       | PM <sub>10</sub> (μg/m <sup>3</sup> ) | SO <sub>2</sub> (ppm) | CO (ppm) | NO <sub>2</sub> (ppm) | O <sub>3</sub> (ppm) |
|---------------------------------------|---------------------------------------|-----------------------|----------|-----------------------|----------------------|
| PM <sub>10</sub> (μg/m <sup>3</sup> ) | 1                                     | 0.210                 | 0.354    | 0.383                 | -0.508               |
| SO <sub>2</sub> (ppm)                 |                                       | 1                     | 0.057    | 0.124                 | 0.033                |
| CO (ppm)                              |                                       |                       | 1        | 0.470                 | -0.513               |
| NO <sub>2</sub> (ppm)                 |                                       |                       |          | 1                     | -0.691               |
| O <sub>3</sub> (ppm)                  |                                       |                       |          |                       | 1                    |

**Table S3.** Cox proportional Hazard Ratios (HRs) of 3-year moving annual average of air pollution for an IQR increase in two-pollutant models for osteoporosis-related fracture in seniors (age ≥50)(*n*= 56,467).

| Pollutant                                  | Two-pollutants model adjusted for pollutant on the left column |                   |                   |                   |                   |
|--------------------------------------------|----------------------------------------------------------------|-------------------|-------------------|-------------------|-------------------|
|                                            | PM <sub>10</sub>                                               | SO <sub>2</sub>   | CO                | NO <sub>2</sub>   | O <sub>3</sub>    |
| PM <sub>10</sub> (13.7 μg/m <sup>3</sup> ) | 1.00 (0.93, 1.07)                                              | 1.05 (1.00, 1.09) | 0.99 (0.94, 1.04) | 1.00 (0.95, 1.05) | 1.00 (0.95, 1.06) |
| SO <sub>2</sub> ( 0.002 ppm)               | 0.98 (0.91, 1.05)                                              | 1.04 (1.00, 1.09) | 0.98 (0.94, 1.03) | 0.99 (0.94, 1.04) | 1.00 (0.95, 1.06) |
| CO ( 0.192 ppm)                            | 1.00 (0.93, 1.07)                                              | 1.04 (1.00, 1.09) | 0.99 (0.95, 1.04) | 1.01 (0.95, 1.06) | 1.00 (0.94, 1.06) |
| NO <sub>2</sub> (0.012 ppm)                | 1.00 (0.93, 1.08)                                              | 1.05 (1.00, 1.09) | 0.99 (0.93, 1.04) | 1.01 (0.96, 1.05) | 1.01 (0.93, 1.10) |
| O <sub>3</sub> (0.007 ppm)                 | 1.00 (0.93, 1.08)                                              | 1.04 (1.00, 1.09) | 0.99 (0.94, 1.04) | 1.01 (0.93, 1.09) | 1.00 (0.95, 1.05) |

Note: HRs in diagonal cells are the results from single-pollutant models.

**Table S4.** Fully adjusted Cox model PM<sub>10</sub> hazard ratios (and 95% CIs) per IQR increase in 3-year moving annual average PM<sub>10</sub> for osteoporosis-related fracture incidence and hazard ratios of covariates (n=56,467).

|                                               | HR (95% CI)       |
|-----------------------------------------------|-------------------|
| PM <sub>10</sub> (13.7 µg/m <sup>3</sup> )    | 1.00 (0.93, 1.07) |
| Diagnosis of rheumatoid arthritis             |                   |
| Yes vs. no                                    | 1.01 (0.92, 1.11) |
| Diagnosis of causes of secondary osteoporosis |                   |
| Yes vs. no                                    | 1.11 (1.01, 1.21) |
| Exposure to oral glucocorticoids              |                   |
| Yes vs. no                                    | 1.28 (1.13, 1.46) |
| Use of anti-osteoporosis agents               |                   |
| Yes vs. no                                    | 3.04 (2.81, 3.28) |
| CCI                                           | 1.02 (1.00, 1.03) |
| BMI (10 kg/m <sup>2</sup> )                   | 0.85 (0.77, 0.93) |
| Smoking status                                |                   |
| Never smoker                                  | Reference         |
| Former smoker                                 | 1.06 (0.93, 1.2)  |
| Current smoker                                | 1.25 (1.11, 1.4)  |
| High alcohol intake                           |                   |
| Yes vs. no                                    | 1.27 (1.07, 1.52) |
| Frequency of exercise per week                |                   |
| Never                                         | Reference         |
| 1-2 times                                     | 0.95 (0.85, 1.07) |
| 3-4 times                                     | 0.85 (0.73, 0.98) |
| 5-6 times                                     | 1.02 (0.82, 1.28) |
| Everyday                                      | 0.96 (0.89, 1.03) |
| Income                                        |                   |
| 1-39 <sup>th</sup> percentiles                | Reference         |
| 40-79 <sup>th</sup> percentiles               | 0.94 (0.86, 1.02) |
| 80-100 <sup>th</sup> percentiles              | 0.93 (0.86, 1.01) |

Note: CCI = Charlson Comorbidity Index, BMI = body mass index. BMD = bone mineral density.

**Table S5.** Fully adjusted Cox model SO<sub>2</sub> hazard ratios (and 95% CIs) per IQR increase in 3-year moving annual average SO<sub>2</sub> for osteoporosis-related fracture incidence and hazard ratios of covariates (*n* = 56,467).

|                                               | HR (95% CI)       |
|-----------------------------------------------|-------------------|
| SO <sub>2</sub> (0.002 ppm)                   | 1.04 (1.00, 1.09) |
| Diagnosis of rheumatoid arthritis             |                   |
| Yes vs. no                                    | 1.01 (0.92, 1.11) |
| Diagnosis of causes of secondary osteoporosis |                   |
| Yes vs. no                                    | 1.11 (1.01, 1.21) |
| Exposure to oral glucocorticoids              |                   |
| Yes vs. no                                    | 1.28 (1.13, 1.46) |
| Use of anti-osteoporosis agents               |                   |
| Yes vs. no                                    | 3.04 (2.81, 3.28) |
| CCI                                           | 1.02 (1.01, 1.03) |
| BMI (10 kg/m <sup>2</sup> )                   | 0.85 (0.77, 0.93) |
| Smoking status                                |                   |
| Never smoker                                  | Reference         |
| Former smoker                                 | 1.06 (0.93, 1.20) |
| Current smoker                                | 1.24 (1.10, 1.40) |
| High alcohol intake                           |                   |
| Yes vs. no                                    | 1.27 (1.07, 1.52) |
| Frequency of exercise per week                |                   |
| Never                                         | Reference         |
| 1-2 times                                     | 0.96 (0.85, 1.07) |
| 3-4 times                                     | 0.85 (0.74, 0.99) |
| 5-6 times                                     | 1.03 (0.82, 1.28) |
| Everyday                                      | 0.96 (0.89, 1.03) |
| Income                                        |                   |
| 1-39 <sup>th</sup> percentiles                | Reference         |
| 40-79 <sup>th</sup> percentiles               | 0.94 (0.86, 1.02) |
| 80-100 <sup>th</sup> percentiles              | 0.93 (0.87, 1.01) |

**Table S6.** Fully adjusted Cox model CO hazard ratios (and 95% CIs) per IQR increase in 3-year moving annual average CO for osteoporosis-related fracture incidence and hazard ratios of covariates ( $n = 56,467$ ).

|                                               | HR (95% CI)       |
|-----------------------------------------------|-------------------|
| CO (0.192 ppm)                                | 0.99 (0.94, 1.04) |
| Diagnosis of rheumatoid arthritis             |                   |
| Yes vs. no                                    | 1.01 (0.92, 1.11) |
| Diagnosis of causes of secondary osteoporosis |                   |
| Yes vs. no                                    | 1.11 (1.01, 1.21) |
| Exposure to oral glucocorticoids              |                   |
| Yes vs. no                                    | 1.28 (1.13, 1.46) |
| Use of anti-osteoporosis agents               |                   |
| Yes vs. no                                    |                   |
| CCI                                           | 1.02 (1.00, 1.03) |
| BMI (10 kg/m <sup>2</sup> )                   | 0.85 (0.77, 0.93) |
| Smoking status                                |                   |
| Never smoker                                  | Reference         |
| Former smoker                                 | 1.06 (0.93, 1.2)  |
| Current smoker                                | 1.24 (1.1, 1.4)   |
| High alcohol intake                           |                   |
| Yes vs. no                                    | 1.27 (1.07, 1.52) |
| Frequency of exercise per week                |                   |
| Never                                         | Reference         |
| 1-2 times                                     | 0.95 (0.85, 1.07) |
| 3-4 times                                     | 0.85 (0.73, 0.98) |
| 5-6 times                                     | 1.02 (0.82, 1.28) |
| Everyday                                      | 0.96 (0.89, 1.03) |
| Income                                        |                   |
| 1-39 <sup>th</sup> percentiles                | Reference         |
| 40-79 <sup>th</sup> percentiles               | 0.94 (0.86, 1.02) |
| 80-100 <sup>th</sup> percentiles              | 0.93 (0.86, 1.01) |

**Table S7.** Fully adjusted Cox model NO<sub>2</sub> hazard ratios (and 95% CIs) per IQR increase in 3-year moving annual average NO<sub>2</sub> for osteoporosis-related fracture incidence and hazard ratios of covariates (*n* = 56,467).

|                                               | HR (95% CI)       |
|-----------------------------------------------|-------------------|
| NO <sub>2</sub> (0.012 ppm)                   | 1.00 (0.96, 1.05) |
| Diagnosis of rheumatoid arthritis             |                   |
| Yes vs. no                                    | 1.01 (0.92, 1.11) |
| Diagnosis of causes of secondary osteoporosis |                   |
| Yes vs. no                                    | 1.11 (1.01, 1.21) |
| Exposure to oral glucocorticoids              |                   |
| Yes vs. no                                    | 1.28 (1.13, 1.46) |
| Use of anti-osteoporosis agents               |                   |
| Yes vs. no                                    | 3.04 (2.81, 3.28) |
| CCI                                           | 1.02 (1, 1.03)    |
| BMI (10 kg/m <sup>2</sup> )                   | 0.85 (0.77, 0.93) |
| Smoking status                                |                   |
| Never smoker                                  | Reference         |
| Former smoker                                 | 1.06 (0.93, 1.2)  |
| Current smoker                                | 1.25 (1.11, 1.4)  |
| High alcohol intake                           |                   |
| Yes vs. no                                    | 1.27 (1.07, 1.52) |
| Frequency of exercise per week                |                   |
| Never                                         | Reference         |
| 1-2 times                                     | 0.95 (0.85, 1.07) |
| 3-4 times                                     | 0.85 (0.73, 0.98) |
| 5-6 times                                     | 1.02 (0.82, 1.28) |
| Everyday                                      | 0.96 (0.89, 1.03) |
| Income                                        |                   |
| 1-39 <sup>th</sup> percentiles                | Reference         |
| 40-79 <sup>th</sup> percentiles               | 0.94 (0.86, 1.02) |
| 80-100 <sup>th</sup> percentiles              | 0.93 (0.86, 1.01) |

**Table S8.** Fully adjusted Cox model O<sub>3</sub> hazard ratios (and 95% CIs) per IQR increase in 3-year moving annual average in O<sub>3</sub> for osteoporosis-related fracture incidence and hazard ratios of covariates (*n* = 56,467).

|                                               | HR (95% CI)       |
|-----------------------------------------------|-------------------|
| O <sub>3</sub> (0.007 ppm)                    | 1.00 (0.95, 1.06) |
| Diagnosis of rheumatoid arthritis             |                   |
| Yes vs. no                                    | 1.01 (0.92, 1.11) |
| Diagnosis of causes of secondary osteoporosis |                   |
| Yes vs. no                                    | 1.11 (1.01, 1.21) |
| Exposure to oral glucocorticoids              |                   |
| Yes vs. no                                    | 1.28 (1.13, 1.46) |
| Use of anti-osteoporosis agents               |                   |
| Yes vs. no                                    | 3.04 (2.81, 3.28) |
| CCI                                           | 1.02 (1.00, 1.03) |
| BMI (10 kg/m <sup>2</sup> )                   | 0.85 (0.77, 0.93) |
| Smoking status                                |                   |
| Never smoker                                  | Reference         |
| Former smoker                                 | 1.06 (0.93, 1.2)  |
| Current smoker                                | 1.25 (1.11, 1.4)  |
| High alcohol intake                           |                   |
| Yes vs. no                                    | 1.27 (1.07, 1.52) |
| Frequency of exercise per week                |                   |
| Never                                         | Reference         |
| 1-2 times                                     | 0.95 (0.85, 1.07) |
| 3-4 times                                     | 0.85 (0.73, 0.98) |
| 5-6 times                                     | 1.02 (0.82, 1.28) |
| Everyday                                      | 0.96 (0.89, 1.03) |
| Income                                        |                   |
| 1-39 <sup>th</sup> percentiles                | Reference         |
| 40-79 <sup>th</sup> percentiles               | 0.94 (0.86, 1.02) |
| 80-100 <sup>th</sup> percentiles              | 0.93 (0.86, 1.01) |
